# Supplementary material for: Development of a Molecular Blood-Based Immune Signature Classifier as Biomarker for Risks Assessment in Lung Cancer Screening
Source: PubMed Central journal article supplement — Cancer Epidemiol Biomarkers Prev. 2022 Aug 29;31(11):2020–9. doi: 10.1158/1055-9965.EPI-22-0689 (PMC9627262; doi:10.1158/1055-9965.epi-22-0689), 2022-08-29
Supplement: epi-22-0689_supplementary_tables_1-8_suppst1-8.pdf [file epi-22-0689_supplementary_tables_1-8_suppst1-8.pdf]

**Supplementary Table 1:** List of antibodies for flow cytometry

| <b>Panel</b> | <b>Antigen</b> | <b>Antibody clone</b> | <b>Supplier</b>  | <b>Catalog number</b> | <b>Fluorophore</b> |
|--------------|----------------|-----------------------|------------------|-----------------------|--------------------|
| TRN A        | LAG3           | 11C3C65               | BIOLEGEND        | 369308                | FITC               |
| TRN A        | CD8            | SK1                   | BIOLEGEND        | 344742                | BV605              |
| TRN A        | CD3            | UCHT1                 | BECKMAN COULTER  | B00068                | KrO                |
| TRN A        | CD4            | RPA-T4                | BD PHARMIGEN     | 555349                | APC                |
| TRN A        | CD16           | 3G8                   | BIOLEGEND        | 302042                | BV650              |
| TRN A        | CD25           | B1.49.9               | BECKMAN COULTER  | B46024                | PC5.5              |
| TRN A        | CD127          | R34.34                | BECKMAN COULTER  | B49220                | PE                 |
| TRN A        | CD28           | CD28.2                | BECKMAN COULTER  | 6607111               | ECD                |
| TRN A        | PD-1           | PD1.3                 | BECKMAN COULTER  | A78885                | PC7                |
| TRN A        | CD56           | N901                  | BECKMAN COULTER  | B46024                | APC-Alexa750       |
| TRN A        | LIVE/DEAD      |                       | MOLECULAR PROBES | L34955                | Violet             |
| TRN A        | TIM3           | 344823                | R&D              | FAB2365N              | Alexa700           |
| TRN B        | CD14           | RM052                 | BECKMAN COULTER  | A86052                | Alexa750           |
| TRN B        | HLA-DR         | Immu-357              | BECKMAN COULTER  | IM3635                | APC                |
| TRN B        | LIVE/DEAD      |                       | MOLECULAR PROBES | L34955                | Violet             |
| TRN B        | CD15           | 80H5                  | BECKMAN COULTER  | B01176                | KrO                |
| TRN B        | LOX1           | 15C4                  | BIOLEGEND        | 358604                | PE                 |
| TRN B        | CD33           | D3HL60.251            | BECKMAN COULTER  | A70198                | PC5.5              |
| TRN B        | CD11b          | Bear1                 | BECKMAN COULTER  | A54822                | PC7                |
| TRN B        | CD16           | 3G8                   | BECKMAN COULTER  | A33098                | ECD                |
| TRN B        | CD3            | UCHT1                 | BD PHARMIGEN     | 555332                | FITC               |
|              | CD20           | 2H7                   |                  | 555622                |                    |
|              | CD19           | HIB19                 |                  | 555412                |                    |
|              | CD56           | B159                  |                  | 562794                |                    |
| TRN C        | LIVE/DEAD      |                       | MOLECULAR PROBES | L23101                | FITC               |
| TRN C        | HLA-DR         | Immu-357              | BECKMAN COULTER  | IM3635                | APC                |
| TRN C        | CD14           | RM052                 | BECKMAN COULTER  | A86052                | Alexa750           |
| TRN C        | CX3CR1         | 2A9-1                 | BDBIOSCIENCE     | 744487                | BV510              |
| TRN C        | CD192          | 48607                 | BDBIOSCIENCE     | 564067                | BV421              |
| TRN C        | PDL-1          | MIH1                  | BDBIOSCIENCE     | 557924                | PE                 |
| TRN C        | CD33           | D3HL60.251            | BECKMAN COULTER  | A70198                | PC5.5              |
| TRN C        | CD3            | OKT3                  | BDBIOSCIENCE     | 566699                | PECF-594           |
| VAL/Sp       | LAG3           | 11C3C65               | BIOLEGEND        | 369308                | FITC               |
| VAL/Sp       | CD16           | 3G8                   | BIOLEGEND        | 302042                | BV650              |
| VAL/Sp       | CD3            | UCHT1                 | BECKMAN COULTER  | B00068                | KrO                |
| VAL/Sp       | CD8            | SK1                   | BIOLEGEND        | 344742                | BV605              |
| VAL/Sp       | HLA-DR         | Immu-357              | BECKMAN COULTER  | IM3635                | APC                |
| VAL/Sp       | CD14           | RM052                 | BECKMAN COULTER  | A86052                | Alexa750           |
| VAL/Sp       | CD56           | B159                  | BDBIOSCIENCE     | 557919                | Alexa700           |
| VAL/Sp       | LIVE/DEAD      |                       | MOLECULAR PROBES | L34955                | Violet             |
| VAL/Sp       | CD15           | 80H5                  | BECKMAN COULTER  | IM2641U               | PC5.5              |
| VAL/Sp       | PDL-1          | MIH1                  | BDBIOSCIENCE     | 563742                | PECF-594           |
| VAL/Sp       | PD1            | PD1.3                 | BECKMAN COULTER  | A78885                | PC7                |
| VAL/Sp       | LOX1           | 15C4                  | BIOLEGEND        | 358604                | PE                 |

**Supplementary Table 2:** List of lymphoid and myeloid immune subpopulations characterized by flow-cytometry

| Population                                                 | Description               | Markers                                                     |
|------------------------------------------------------------|---------------------------|-------------------------------------------------------------|
| <b>Lymphoid</b>                                            |                           |                                                             |
| T                                                          | T Lymphocytes             | CD3+                                                        |
| T CD8 <sup>+</sup>                                         | CD8+ T cells              | CD3+ CD8+                                                   |
| T CD3 <sup>+</sup> CD8 <sup>high</sup>                     | Activated T cells         | CD3+ CD8 <sup>high</sup>                                    |
| T CD8 <sup>+</sup> TIM3 <sup>+</sup>                       | Anergic T cells           | CD3+ CD8+ TIM3+                                             |
| T CD8 <sup>+</sup> PD-1 <sup>+</sup>                       | Cytotoxic T cells         | CD3+ CD8+ PD-1+                                             |
| T CD8 <sup>+</sup> PD-1 <sup>+</sup> LAG3 <sup>+</sup>     | Exhausted T cells         | CD3+ CD8+ PD-1+ LAG3+                                       |
| T CD8 <sup>+</sup> CD28 <sup>+</sup>                       | Memory T cells            | CD3+ CD8+ CD28+                                             |
| T CD4 <sup>+</sup>                                         | CD4+ T cells              | CD3+ CD4+                                                   |
| T CD4 <sup>+</sup> CD25 <sup>high</sup> CD127 <sup>+</sup> | CD4+ T cell effectors     | CD3+ CD4+ CD25 <sup>high</sup> CD127+                       |
| T reg                                                      | T reg                     | CD3+ CD4+ CD25 <sup>high</sup> CD127 <sup>neg</sup>         |
| NK-like T CD56 <sup>neg</sup>                              | NK T cells                | CD3+ CD56 <sup>neg</sup> CD16 <sup>int</sup>                |
| NK-like T                                                  | Activated NK T cells      | CD3+ CD56+ CD16 <sup>int</sup>                              |
| NK-like T CD16 <sup>high</sup>                             | ADCC prone NK T cells     | CD3+ CD56+ CD16 <sup>high</sup>                             |
| NK CD56 <sup>neg</sup>                                     | Mature NK                 | CD3 <sup>neg</sup> CD56 <sup>neg</sup> CD16+                |
| NK CD56 <sup>neg</sup> CD16 <sup>high</sup>                | ADCC prone NK             | CD3 <sup>neg</sup> CD56 <sup>neg</sup> CD16 <sup>high</sup> |
| NK CD56 <sup>dim</sup>                                     | Cytotoxic NK              | CD3 <sup>neg</sup> CD56 <sup>dim</sup> CD16+                |
| NK CD56 <sup>dim</sup> CD16 <sup>neg</sup>                 | Resting NK                | CD3 <sup>neg</sup> CD56 <sup>dim</sup> CD16 <sup>neg</sup>  |
| NK TIM3+                                                   | Anergic NK                | CD3 <sup>neg</sup> CD56 <sup>dim</sup> CD16+ TIM3+          |
| NK CD16 <sup>neg</sup>                                     | Th1 cytokine secreting NK | CD3 <sup>neg</sup> CD56 <sup>high</sup> CD16 <sup>neg</sup> |
| <b>Myeloid</b>                                             |                           |                                                             |
| Mo                                                         | Monocytes                 | CD14+                                                       |
| C-Mo                                                       | Classical monocytes       | CD14+ CD16 <sup>neg</sup>                                   |
| I-Mo                                                       | Intermediate monocytes    | CD14+ CD16+                                                 |
| M-MDSCs                                                    | M-MDSCs                   | CD14+ HLA-DR <sup>neg</sup>                                 |
| Mo PD-L1 <sup>+</sup>                                      | Activated monocytes       | CD14+ PD-L1+                                                |
| Mo CCR2 <sup>+</sup>                                       | Migration-prone monocytes | CD14+ CCR2+                                                 |
| Mo CX3CR1 <sup>+</sup>                                     | Proangiogenic monocytes   | CD14+ CX3CR1+                                               |
| Mo HLA-DR <sup>bright</sup>                                | Protective monocytes      | CD14+ HLA-DR <sup>bright</sup>                              |
| Mo Lox-1 <sup>+</sup>                                      | Lox-1 monocytes           | CD14 <sup>high</sup> LOX1+                                  |
| NC-Mo                                                      | Non-classical monocytes   | CD14 <sup>dim</sup> CD16+                                   |
| Mo CD14 <sup>dim</sup>                                     | Inflammatory monocytes    | CD14 <sup>dim</sup> CD16 <sup>neg</sup>                     |
| PMN-MDSCs                                                  | PMN-MDSCs                 | CD15+ HLA-DR <sup>neg</sup>                                 |
| PMN-MDSCs LOX1 <sup>+</sup>                                | Activated PMN-MDSCs       | CD15+ HLA-DR <sup>neg</sup> LOX1+                           |

**Supplementary Table 3:** List of genes selected as representative of the 4 immune cell subsets discriminating lung cancer patients and controls. Numbers indicate the respective reference/s.

| Gene Symbol     | Assay ID             | Represented immune subset (Ref) |        |        |           | Reliable by RT-qPCR | Filtered in by the calibration set |
|-----------------|----------------------|---------------------------------|--------|--------|-----------|---------------------|------------------------------------|
|                 |                      | T CD8+PD-1+                     | I-Mo   | M-MDSC | PMN-MDSC  |                     |                                    |
| <i>APBA2</i>    | <i>Hs00194072_m1</i> | X (24)                          |        |        |           | X                   | X                                  |
| <i>ARG1</i>     | <i>Hs00163660_m1</i> |                                 |        |        | X (30)    |                     |                                    |
| <i>CCL13</i>    | <i>Hs00234646_m1</i> |                                 |        | X (30) |           |                     |                                    |
| <i>CCL2</i>     | <i>Hs00234140_m1</i> |                                 |        | X (26) |           | X                   |                                    |
| <i>CCL26</i>    | <i>Hs00171146_m1</i> |                                 | X (30) |        |           |                     |                                    |
| <i>CCR5</i>     | <i>Hs99999149_s1</i> |                                 | X (29) |        |           | X                   |                                    |
| <i>CD14</i> *   | <i>Hs02621496_s1</i> |                                 | X      | X      |           | X                   | X                                  |
| <i>CD274</i>    | <i>Hs01125301_m1</i> |                                 |        | X (26) |           | X                   | X                                  |
| <i>CD3D</i> *   | <i>Hs00174158_m1</i> | X                               |        |        |           | X                   |                                    |
| <i>CD8A</i> *   | <i>Hs00233520_m1</i> | X                               |        |        |           | X                   | X                                  |
| <i>CEACAM8</i>  | <i>Hs00266198_m1</i> |                                 |        |        | X (30)    |                     |                                    |
| <i>FCGR3A</i> * | <i>Hs02388314_m1</i> |                                 | X      |        |           | X                   |                                    |
| <i>FPR1</i>     | <i>Hs04235426_s1</i> |                                 |        |        | X (24,25) | X                   | X                                  |
| <i>FUT4</i> *   | <i>Hs01106466_s1</i> |                                 |        |        | X         | X                   | X                                  |
| <i>GFRA2</i>    | <i>Hs00176393_m1</i> |                                 | X (30) |        |           | X                   | X                                  |
| <i>GZMB</i>     | <i>Hs00188051_m1</i> | X (25)                          |        |        |           | X                   | X                                  |
| <i>HCAR2</i>    | <i>Hs02341584_s1</i> |                                 |        |        | X (27)    | X                   | X                                  |
| <i>IFNG</i>     | <i>Hs00166223_m1</i> | X (25)                          |        |        |           | X                   |                                    |
| <i>IL6</i>      | <i>Hs00174131_m1</i> |                                 |        | X (26) |           |                     |                                    |
| <i>OLR1</i>     | <i>Hs01552593_m1</i> |                                 |        |        | X (30)    |                     |                                    |
| <i>PDCD1</i> *  | <i>Hs01550088_m1</i> | X                               |        |        |           | X                   | X                                  |
| <i>PRF1</i>     | <i>Hs00169473_m1</i> | X (24,25)                       |        |        |           | X                   | X                                  |
| <i>S100A9</i>   | <i>Hs00610058_m1</i> |                                 |        |        | X (28)    | X                   |                                    |
| <i>S1PR3</i>    | <i>Hs00245464_m1</i> |                                 |        | X (30) |           | X                   | X                                  |
| <i>SEMA4B</i>   | <i>Hs00384240_m1</i> |                                 |        | X (26) |           | X                   | X                                  |
| <i>TGFB1</i>    | <i>Hs00998133_m1</i> |                                 |        | X (26) |           | X                   | X                                  |

\*Gene selected on the basis of immune cell phenotype as determined by flow cytometry analysis.

**Supplementary Table 4:** Distribution of immune cells subsets according to clinico-pathological and molecular characteristics in the training set. Student's t-test p-value are reported. p-value<0.05 at the univariate level (in bold) is considered significant.

|                                             | Gender<br>(F vs. M) | Age<br>(≤60 vs. >60) | Pack-year<br>(<44 vs. ≥44) | MSC<br>(pos vs. neg) | Tumor histology<br>(ADC vs. Others) | Stage<br>(I vs. II-V) |
|---------------------------------------------|---------------------|----------------------|----------------------------|----------------------|-------------------------------------|-----------------------|
| T                                           | 0.6487              | 0.8651               | 0.7293                     | 0.5096               | 0.3018                              | 0.1781                |
| T CD8+                                      | 0.0583              | 0.1470               | 0.6304                     | 0.9648               | 0.3723                              | 0.4497                |
| T CD3+ CD8 <sup>high</sup>                  | 0.0833              | 0.2304               | 0.6548                     | 0.8060               | 0.5289                              | 0.6051                |
| T CD8+ TIM3+                                | 0.1312              | 0.3913               | 0.5252                     | 0.0877               | 0.6570                              | 0.9506                |
| T CD8+ PD-1+                                | 0.6922              | 0.8376               | 0.0972                     | 0.2466               | 0.0870                              | <b>0.0071</b>         |
| T CD8+ PD-1+ LAG3+                          | 0.1624              | 0.0823               | 0.6199                     | 0.3881               | 0.8815                              | 0.1910                |
| T CD8+ CD28+                                | 0.9123              | 0.6044               | 0.6228                     | 0.1904               | 0.7876                              | 0.3356                |
| T CD4+                                      | 0.0598              | 0.1009               | 0.6009                     | 0.6684               | 0.3646                              | 0.3872                |
| T CD4+ CD25 <sup>high</sup> CD127+          | 0.7973              | 0.3892               | 0.2192                     | 0.8755               | 0.1014                              | 0.1150                |
| T reg                                       | 0.5966              | 0.7664               | 0.6903                     | 0.4418               | 0.6074                              | 0.1405                |
| NK-like T CD56 <sup>neg</sup>               | <b>0.0234</b>       | 0.1284               | 0.5575                     | 0.5135               | 0.0907                              | 0.5927                |
| NK-like T                                   | 0.7763              | 0.5724               | 0.9999                     | 0.7761               | 0.7142                              | 0.5954                |
| NK-like T CD16 <sup>high</sup>              | 0.7119              | 0.4075               | 0.1710                     | 0.9403               | 0.4285                              | 0.3077                |
| NK CD56 <sup>neg</sup>                      | 0.8219              | 0.1964               | 0.8469                     | 0.2377               | 0.1885                              | 0.9219                |
| NK CD56 <sup>neg</sup> CD16 <sup>high</sup> | 0.6491              | 0.6945               | 0.2911                     | 0.8503               | 0.0824                              | 0.2112                |
| NK CD56 <sup>dim</sup>                      | 0.6347              | 0.7867               | 0.6115                     | 0.0877               | 0.3720                              | 0.2363                |
| NK CD56 <sup>dim</sup> CD16 <sup>neg</sup>  | 0.0954              | 0.6564               | 0.3759                     | 0.8540               | 0.3032                              | 0.6814                |
| NK TIM3+                                    | 0.1008              | 0.8727               | 0.4122                     | 0.2461               | 0.2840                              | 0.3526                |
| NK CD16 <sup>neg</sup>                      | 0.2569              | 0.9768               | 0.9241                     | <b>0.0392</b>        | 0.5599                              | 0.2673                |
| Mo                                          | 0.6771              | 0.9850               | 0.4108                     | 0.5207               | 0.7401                              | 0.1757                |
| C-Mo                                        | 0.8158              | 0.3074               | 0.1750                     | 0.4202               | 0.1438                              | 0.5763                |
| I-Mo                                        | 0.2800              | 0.1955               | 0.9208                     | 0.8737               | 0.1271                              | 0.8235                |
| M-MDSCs                                     | 0.6687              | 0.8275               | 0.6479                     | 0.7624               | 0.2307                              | 0.4793                |
| Mo PD-L1+                                   | 0.0973              | 0.0969               | 0.7911                     | 0.9443               | 0.7733                              | 0.8989                |
| Mo CCR2+                                    | 0.4810              | <b>0.0378</b>        | 0.2443                     | 0.5844               | 0.7765                              | 0.0606                |
| Mo CX3CR1+                                  | 0.4117              | 0.2321               | 0.8282                     | 0.6083               | 0.7137                              | <b>0.0070</b>         |
| Mo HLA-DR <sup>bright</sup>                 | 0.7219              | 0.5590               | 0.5757                     | 0.8413               | 0.2405                              | 0.0583                |
| Mo Lox-1+                                   | 0.0846              | 0.0840               | 0.9956                     | 0.9924               | 0.5589                              | 0.9125                |
| NC-Mo                                       | 0.6611              | 0.6151               | 0.4311                     | 0.4452               | 0.5377                              | 0.1774                |
| Mo CD14 <sup>dim</sup>                      | 0.2869              | 0.4189               | 0.7134                     | 0.1101               | 0.3830                              | 0.3999                |
| PMN-MDSC                                    | 0.3836              | 0.3317               | <b>0.0135</b>              | 0.3079               | 0.4849                              | 0.8146                |
| PMN-MDSC LOX1+                              | 0.0999              | 0.1848               | 0.1577                     | 0.1131               | 0.4446                              | 0.5053                |

**Supplementary Table 5:** Immune cell subsets whose levels differed at the univariate level (t-test p-value<0.05; fold-change>1.5) in PBMC samples collected from 20 lung cancer patients and 20 matched controls in the training set.

| <b>Immune population</b>   | <b>Mean value in lung cancer patients</b> | <b>Mean value in control subjects</b> | <b>Fold-change</b> | <b>P-value</b> |
|----------------------------|-------------------------------------------|---------------------------------------|--------------------|----------------|
| <b>PMN-MDSCs</b>           | 1.06                                      | 0.36                                  | 2.95               | 0.0053         |
| <b>M-MDSCs</b>             | 1.09                                      | 0.61                                  | 1.78               | 0.0198         |
| <b>Mo CD14dim</b>          | 12.18                                     | 6.88                                  | 1.77               | 0.0403         |
| <b>T CD8+ PD-1+</b>        | 12.48                                     | 22.68                                 | 0.55               | 0.0003         |
| <b>IMo</b>                 | 2.00                                      | 4.17                                  | 0.48               | 0.0063         |
| <b>NK CD56dim</b>          | 15.61                                     | 37.05                                 | 0.42               | 0.0001         |
| <b>NK-like T CD16high</b>  | 0.30                                      | 0.80                                  | 0.37               | 0.0148         |
| <b>NK CD56neg CD16high</b> | 0.30                                      | 1.25                                  | 0.24               | 0.0031         |

**Supplementary Table 6:** Performance of the ISC test in terms of Sensitivity (Se), specificity (Sp), positive predictive value (PPV) and negative predictive value (NPV) in the training, validation and LC specificity set considering all, only MSC positive and only MSC negative subjects.

|                | <b>Training set</b> | <b>Validation set</b> | <b>LC Specificity set</b> |
|----------------|---------------------|-----------------------|---------------------------|
| <i>All</i>     |                     |                       |                           |
| <b>Se</b>      | 95%                 | 80%                   | 84%                       |
| <b>Sp</b>      | 85%                 | 60%                   | 75%                       |
| <b>PPV</b>     | 86%                 | 67%                   | 89%                       |
| <b>NPV</b>     | 94%                 | 75%                   | 67%                       |
| <i>MSC pos</i> |                     |                       |                           |
| <b>Se</b>      | 93%                 | 80%                   | 78%                       |
| <b>Sp</b>      | 86%                 | 52%                   | 67%                       |
| <b>PPV</b>     | 87%                 | 63%                   | 88%                       |
| <b>NPV</b>     | 92%                 | 75%                   | 50%                       |
| <i>MSC neg</i> |                     |                       |                           |
| <b>Se</b>      | 100%                | 80%                   | 90%                       |
| <b>Sp</b>      | 83%                 | 73%                   | 80%                       |
| <b>PPV</b>     | 86%                 | 75%                   | 90%                       |
| <b>NPV</b>     | 100%                | 79%                   | 80%                       |

**Supplementary Table 7.** Performance of the ISC qPCR-based test in terms of Sensitivity (Se), specificity (Sp), positive predictive value (PPV) and negative predictive value (NPV) in validation set considering all, only MSC positive and only MSC negative subjects.

| <b>Validation set</b> |     |
|-----------------------|-----|
| <i>All</i>            |     |
| <b>Se</b>             | 79% |
| <b>Sp</b>             | 64% |
| <b>PPV</b>            | 66% |
| <b>NPV</b>            | 78% |
| <i>MSC pos</i>        |     |
| <b>Se</b>             | 77% |
| <b>Sp</b>             | 60% |
| <b>PPV</b>            | 63% |
| <b>NPV</b>            | 75% |
| <i>MSC neg</i>        |     |
| <b>Se</b>             | 83% |
| <b>Sp</b>             | 71% |
| <b>PPV</b>            | 71% |
| <b>NPV</b>            | 83% |

**Supplementary Table 8.** Microarray gene expression dataset obtained from PBMC (GSE13255) and whole blood (GSE108375) datasets.

|                                | GSE13255    |                               | GSE108375                          |                                 |
|--------------------------------|-------------|-------------------------------|------------------------------------|---------------------------------|
|                                | 27<br>NSCLC | 6<br>Non-healthy<br>controls* | 29<br>Pts with<br>malignant nodule | 37<br>Pts with benign<br>nodule |
| <b>Gender</b>                  |             |                               |                                    |                                 |
| Female                         | 17          | 3                             | 14                                 | 20                              |
| Male                           | 10          | 3                             | 15                                 | 17                              |
| <b>Median age (IQR)</b>        | 68 (15)     | 53 (7)                        | 65 (8)                             | 63 (11)                         |
| <b>Median Pack-years (IQR)</b> | /           | /                             | 60 (43)                            | 50 (20)                         |
| <b>Histology</b>               |             |                               |                                    |                                 |
| ADC                            | 13          | /                             | /                                  | /                               |
| Other                          | 14          | /                             | /                                  | /                               |
| <b>Stage</b>                   |             |                               |                                    |                                 |
| I                              | 15          | /                             | 21                                 | /                               |
| II-IV                          | 12          | /                             | 8                                  | /                               |

\*2 granulomous inflammation, 1 hamartoma, 1 sarcoidosis, 1 hypertension and 1 cirrhosis
