# Supplementary figures and images for: Development of a Molecular Blood-Based Immune Signature Classifier as Biomarker for Risks Assessment in Lung Cancer Screening
Source: PubMed Central journal article supplement — Cancer Epidemiol Biomarkers Prev. 2022 Aug 29;31(11):2020–9. doi: 10.1158/1055-9965.EPI-22-0689 (PMC9627262; doi:10.1158/1055-9965.epi-22-0689), 2022-08-29

Supplementary Figure 1

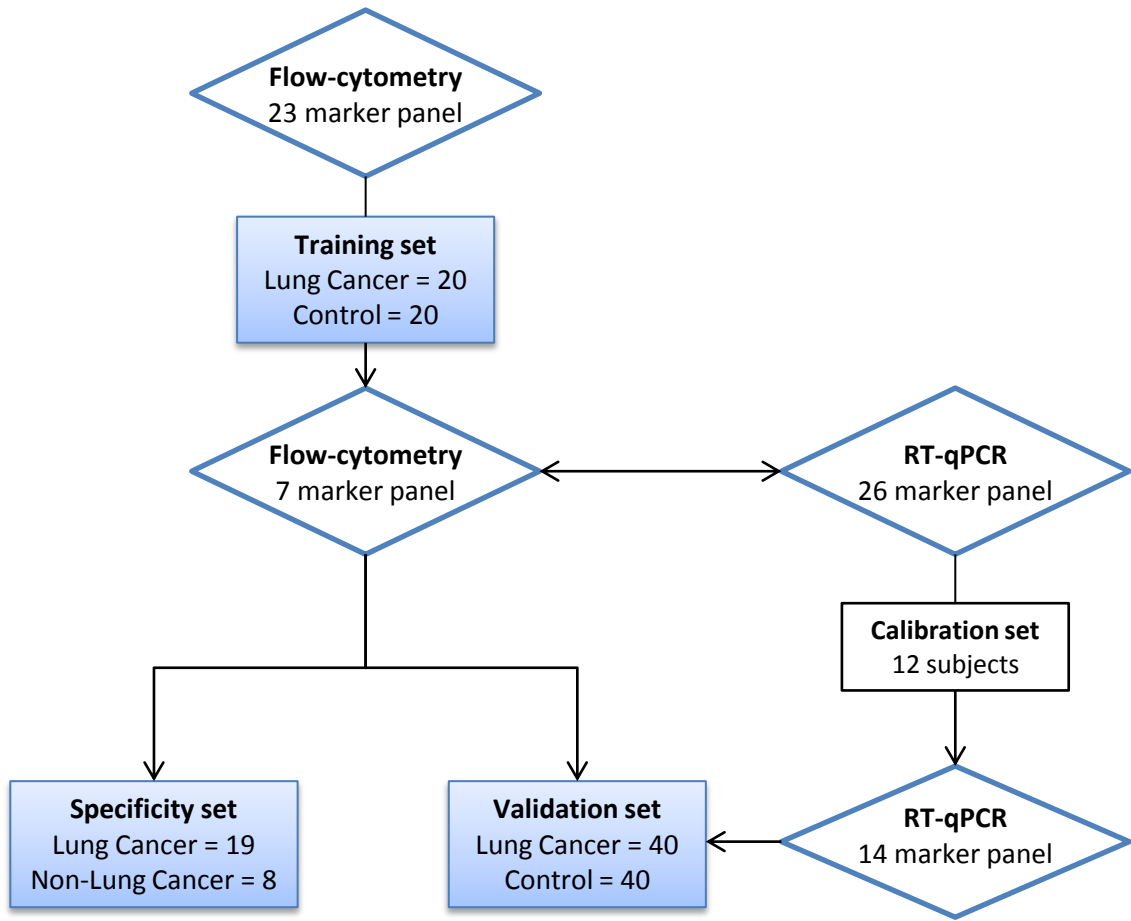

# Supplementary Figure 2

A)

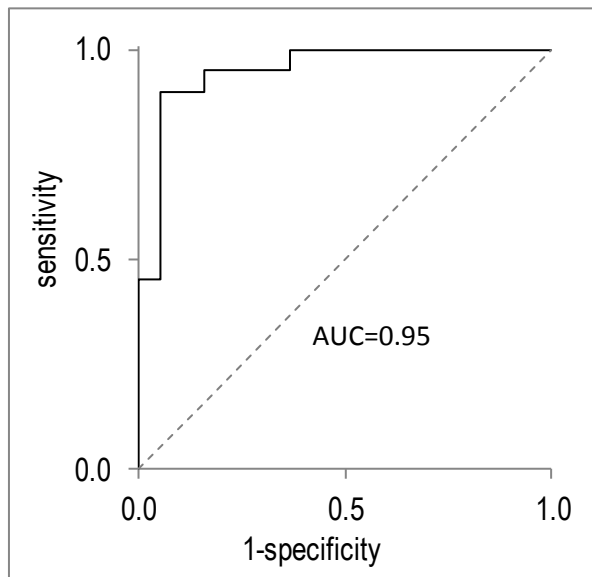

B)

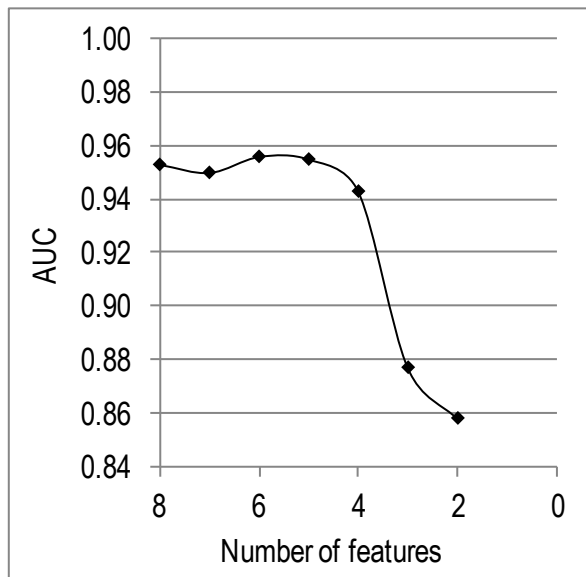

**Supplementary Figure 3**

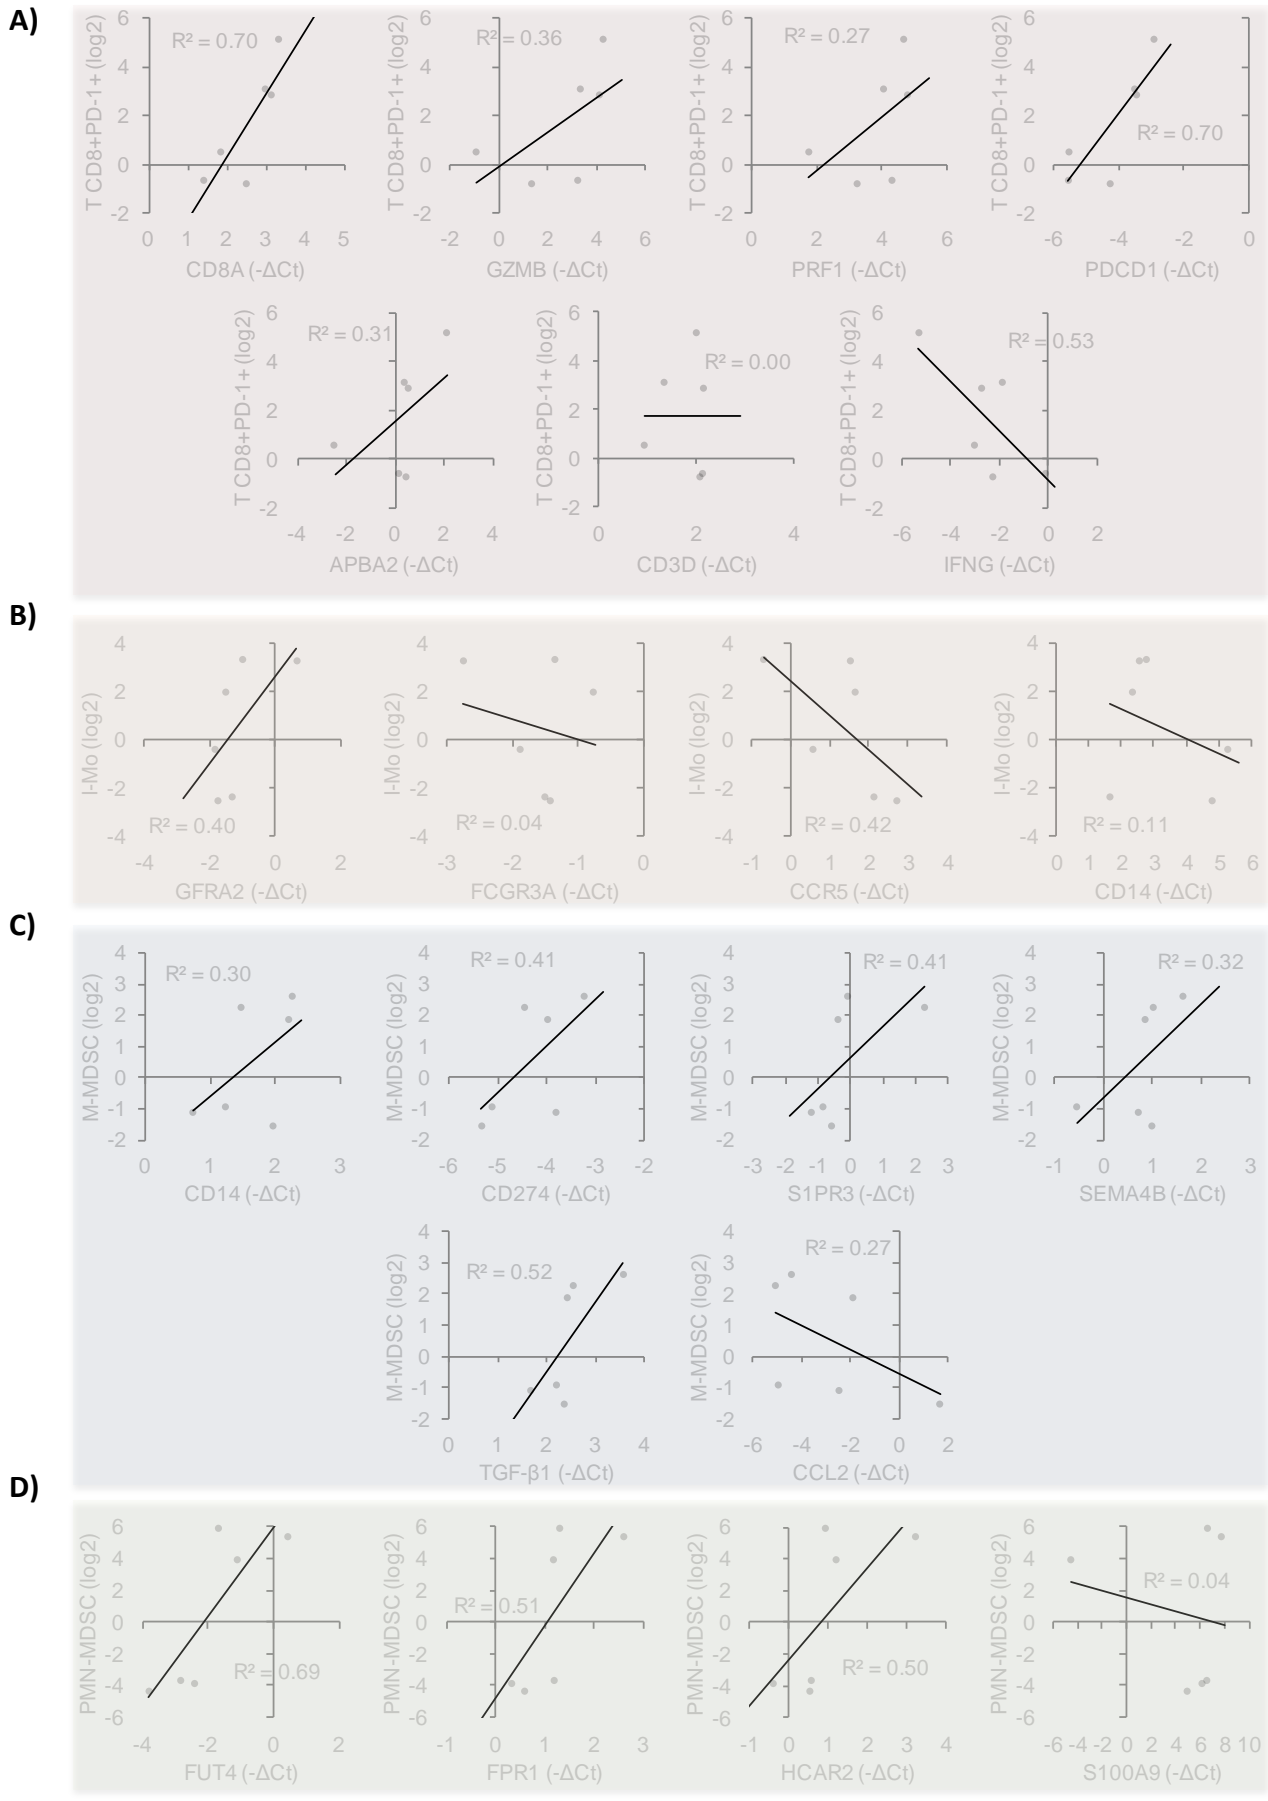

Supplementary Figure 4

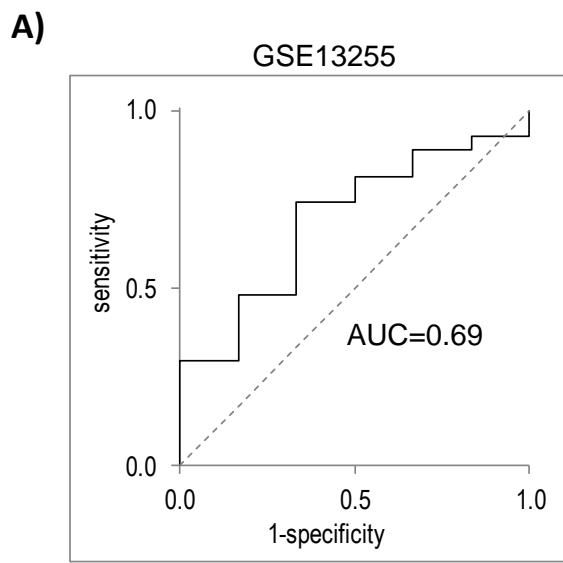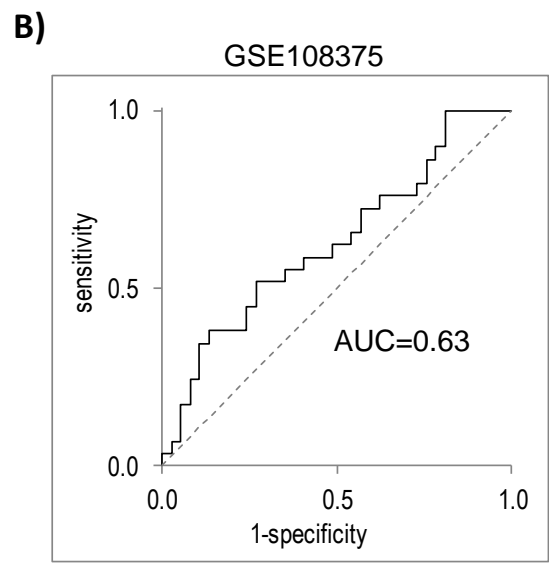

Supplement: epi-22-0689_supplementary_figures_1-4_suppsf1-4.pdf [file epi-22-0689_supplementary_figures_1-4_suppsf1-4.pdf]
